# Supplementary material for: Views on Precision Medicine among Health Professionals in Korea: A Mixed Methods Study
Source: PubMed Central journal article supplement — Yonsei Med J. 2020 Jan 22;61(2):192–7. doi: 10.3349/ymj.2020.61.2.192 (PMC6992457; doi:10.3349/ymj.2020.61.2.192), 2020-01-22
Supplement: ymj-61-192-s001.pdf [file ymj-61-192-s001.pdf]

## SUPPLEMENTARY MATERIALS

### Survey Questionnaire

Q1) What is the first thing that comes to mind with the words “precision medicine”?  
( )

Q2) Various personal information is needed for precision medicine. Please select all the items listed below that you think are necessary for precision medicine (Multiple responses).

- ① Genetic information
- ② Body measurement (height, weight)
- ③ Residential area
- ④ Income
- ⑤ Medical records
- ⑥ Health insurance claims data
- ⑦ Life style
- ⑧ Biospecimens (blood, tissue, cell)
- ⑨ Economic consumption behaviors

Q3) Please read the following questions regarding precision medicine and indicate the degree to which you agree with each question.

| Precision medicine would... |                                                                                    | Strongly disagree | Disagree | Agree | Strongly agree |
|-----------------------------|------------------------------------------------------------------------------------|-------------------|----------|-------|----------------|
| 1                           | Improve quality of life through personalized health care.                          | ①                 | ②        | ③     | ④              |
| 2                           | Predict disease in advance.                                                        | ①                 | ②        | ③     | ④              |
| 3                           | Increase individual health care costs.                                             | ①                 | ②        | ③     | ④              |
| 4                           | Obviate unnecessary tests for diagnosis.                                           | ①                 | ②        | ③     | ④              |
| 5                           | Diagnose disease more precisely.                                                   | ①                 | ②        | ③     | ④              |
| 6                           | Improve treatment performance through development of personalized treatment.       | ①                 | ②        | ③     | ④              |
| 7                           | Reduce overall health care costs by using personalized treatment.                  | ①                 | ②        | ③     | ④              |
| 8                           | Reduce side effects from treatment.                                                | ①                 | ②        | ③     | ④              |
| 9                           | Improve life expectancy.                                                           | ①                 | ②        | ③     | ④              |
| 10                          | Take a long time until realization.                                                | ①                 | ②        | ③     | ④              |
| 11                          | Pose a risk to privacy infringement.                                               | ①                 | ②        | ③     | ④              |
| 12                          | Increase disparity of public health (when precision medicine is introduced, only). | ①                 | ②        | ③     | ④              |

※ The following questions are based on assumptions of a specific situation.

Q4) To implement precision medicine, information on more than 100,000 people is needed for research. If research on collecting and integrating your information (genome, medical records, lifestyle, etc.) is carried out for the implementation of precision medicine under the government, would you participate as research subjects?

- ① I would participate
- ② I would not participate

Q5) The genome test (genetic information service) that is performed for precision medicine could range in cost from about 50,000 won to about 10 million won per test. How much would you be willing to pay to undergo genetic testing for precision medicine?

- ① Do not want to pay
- ② <50,000 won
- ③ 50,000 won ≤ willingness to pay <100,000 won
- ④ 100,000won ≤ willingness to pay <500,000 won
- ⑤ 500,000 won ≤ willingness to pay <1 million won
- ⑥ 1 million won ≤ willingness to pay <3 million won
- ⑦ 3 million won ≤ willingness to pay <5 million won
- ⑧ ≥5million won
- ⑨ I would pay regardless of cost

Q6) For precision medicine, various information on personal health is needed. Which of the following information would you provide? Please select the information that is available for each treatment purpose.

| Items |                                                                                                          | Provide Information for individual treatment |    | Information for treatment of others |    |
|-------|----------------------------------------------------------------------------------------------------------|----------------------------------------------|----|-------------------------------------|----|
|       |                                                                                                          | Yes                                          | No | Yes                                 | No |
| 1     | Genetic information (presence of genetic disease, gene mutations, possibility of specific disease, etc.) | ①                                            | ②  | ①                                   | ②  |
| 2     | Body measurements (height, weight, fat mass, muscle mass, etc.)                                          | ①                                            | ②  | ①                                   | ②  |
| 3     | Medical records                                                                                          | ①                                            | ②  | ①                                   | ②  |
| 4     | Lifestyle (eating habits, physical activities, sleep patterns, etc.)                                     | ①                                            | ②  | ①                                   | ②  |

|                            |                                                                                                                                                                                                                                                                                                                                                                                                                                                                                                                                                                                                                                                                                                                                                                                                                                                                                                                                                                                                                                              |     |                 |
|----------------------------|----------------------------------------------------------------------------------------------------------------------------------------------------------------------------------------------------------------------------------------------------------------------------------------------------------------------------------------------------------------------------------------------------------------------------------------------------------------------------------------------------------------------------------------------------------------------------------------------------------------------------------------------------------------------------------------------------------------------------------------------------------------------------------------------------------------------------------------------------------------------------------------------------------------------------------------------------------------------------------------------------------------------------------------------|-----|-----------------|
| Age                        | _____                                                                                                                                                                                                                                                                                                                                                                                                                                                                                                                                                                                                                                                                                                                                                                                                                                                                                                                                                                                                                                        | Sex | ① Male ② Female |
| Occupation                 | ① Clinicians → Specialty: Go to the following question<br>② Professor (Major:     )<br>③ Researcher (Specialty:     )<br>④ Nurse<br>⑤ Student (Major:     )<br>⑥ Etc.                                                                                                                                                                                                                                                                                                                                                                                                                                                                                                                                                                                                                                                                                                                                                                                                                                                                        |     |                 |
| Specialty                  | Which of the following applies to you?<br>① Specialist   ② Resident   ③ General practitioner                                                                                                                                                                                                                                                                                                                                                                                                                                                                                                                                                                                                                                                                                                                                                                                                                                                                                                                                                 |     |                 |
|                            | What is your specialty?<br>① Cardiology                      ② Pulmonology                      ③ Gastroenterology<br>④ Nephrology                      ⑤ Infectious disease                      ⑥ Rheumatology<br>⑦ Endocrinology                      ⑧ Hemato-oncology                      ⑨ General surgery<br>⑩ Thoracic and cardiovascular surgery                      ⑪ Neurosurgery<br>⑫ Orthopedics                      ⑬ Plastic surgery                      ⑭ Urology<br>⑮ Ophthalmology                      ⑯ Otorhinolaryngology                      ⑰ Obstetrics and gynecology<br>⑱ Pediatrics                      ⑲ Neurology                      ⑳ Neuropsychiatry<br>㉑ Dermatology                      ㉒ Family medicine                      ㉓ Emergency medicine<br>㉔ Radiology                      ㉕ Nuclear medicine                      ㉖ Pathology<br>㉗ Radiation oncology                      ㉘ Laboratory medicine                      ㉙ Anesthesiology<br>㉚ Industrial/preventive medicine   ㉛ Etc. |     |                 |
| Education                  | ① Bachelor's degree<br>② Master's degree<br>③ Ph.D.                                                                                                                                                                                                                                                                                                                                                                                                                                                                                                                                                                                                                                                                                                                                                                                                                                                                                                                                                                                          |     |                 |
| Type of work place         | ① A university hospital                      ② A general hospital                      ③ A clinic<br>④ A university                      ⑤ A national research institute<br>⑥ A private research institute                      ⑦ A pharmaceutical company<br>⑧ Etc. (     )                                                                                                                                                                                                                                                                                                                                                                                                                                                                                                                                                                                                                                                                                                                                                                 |     |                 |
| Members of household       | How many people are living in your household (excluding yourself)?                                                                                                                                                                                                                                                                                                                                                                                                                                                                                                                                                                                                                                                                                                                                                                                                                                                                                                                                                                           |     |                 |
| Household income per month | Please provide your monthly household income, including any National Basic Livelihood Grants.<br>※ Total family members' income (rent, interest income, pension)<br>① Less than 500,000 won<br>② 500,000–990,000 won<br>③ 1 million–1,490,000 won<br>④ 1,500,000–1,990,000 won<br>⑤ 2,000,000–2,490,000 won<br>⑥ 2,500,000–2,990,000 won<br>⑦ 3,000,000–3,490,000 won<br>⑧ 3,500,000–3,990,000 won<br>⑨ 4,000,000–4,990,000 won<br>⑩ 5,000,000–5,990,000 won<br>⑪ Equal or more than 6,000,000 won                                                                                                                                                                                                                                                                                                                                                                                                                                                                                                                                           |     |                 |
| Current residence          | _____ Do _____ Si (gun, gu) _____ (Eup, myeon, dong)                                                                                                                                                                                                                                                                                                                                                                                                                                                                                                                                                                                                                                                                                                                                                                                                                                                                                                                                                                                         |     |                 |
